# Supplementary material
Source: Springer Nature journal article supplement (https://www.springermedizin.de/resource/supplementary/12885_2013_4784_MOESM4_ESM.pdf/9467296)

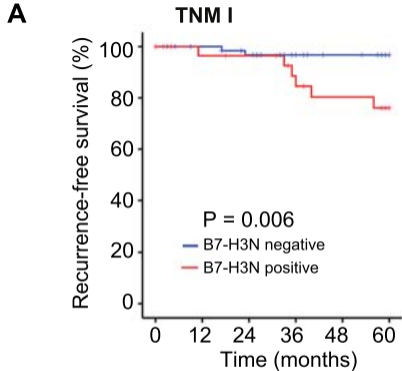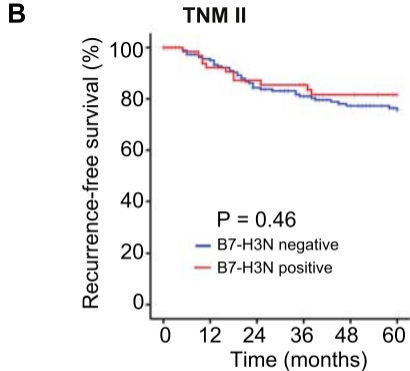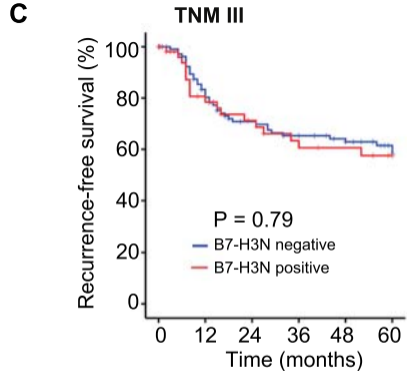

No. at risk:

|            |    |    |    |    |    |    |
|------------|----|----|----|----|----|----|
| B7-H3N neg | 70 | 62 | 58 | 52 | 47 | 42 |
| B7-H3N pos | 33 | 27 | 26 | 22 | 19 | 15 |

No. at risk:

|            |     |     |     |     |    |    |
|------------|-----|-----|-----|-----|----|----|
| B7-H3N neg | 214 | 167 | 135 | 116 | 99 | 85 |
| B7-H3N pos | 73  | 59  | 49  | 46  | 39 | 36 |

No. at risk:

|            |     |    |    |    |    |    |
|------------|-----|----|----|----|----|----|
| B7-H3N neg | 116 | 82 | 64 | 58 | 53 | 39 |
| B7-H3N pos | 56  | 36 | 28 | 23 | 20 | 17 |

Supplement: MOESM4 [file 9467296]
